# Supplementary material for: Media Consumption and Creation in Attitudes Toward and Knowledge of Inflammatory Bowel Disease: Web-Based Survey
Source: PubMed Central journal article supplement (PMC5741823; doi:10.2196/jmir.7624), 2017-12-08
Supplement: jmir_v19i12e403_app1.pdf [file jmir_v19i12e403_app1.pdf]

## Multimedia Appendix

Appendix A  
Index for IBD Knowledge

*Instructions: Please answer the following questions to the best of your ability about inflammatory bowel disease.*

| <b>Index Statement</b>                                                                            | <b>Response Options*</b> |              |
|---------------------------------------------------------------------------------------------------|--------------------------|--------------|
| Cultural norms, such as diet, are presumed to be a leading cause of IBD by medical professionals. | True                     | <b>False</b> |
| Lack of exercise is presumed to be a leading cause of IBD.                                        | True                     | <b>False</b> |
| People of all ages are equally likely to be diagnosed with IBD.                                   | True                     | <b>False</b> |
| Crohn's disease can affect any part of the gastrointestinal tract, from the mouth to the anus.    | <b>True</b>              | False        |
| Crohn's disease and Ulcerative Colitis are the same disease.                                      | True                     | <b>False</b> |
| IBS also known as irritable bowel syndrome is a type of inflammatory bowel disease.               | True                     | <b>False</b> |
| Ulcerative Colitis and Crohn's disease tend to run in families.                                   | <b>True</b>              | False        |
| Medications can cure inflammatory bowel disease.                                                  | True                     | <b>False</b> |
| Patients with IBD have an increased risk of developing colon cancer.                              | <b>True</b>              | False        |
| Most patients with Crohn's disease will require surgery in their lifetime.                        | <b>True</b>              | False        |
| Natural and homeopathic remedies have been shown to improve and/or cure IBD.                      | True                     | <b>False</b> |
| Most people with IBD will eventually need to stop working due to their disease.                   | True                     | <b>False</b> |

\*Correct answer selection made bold to assist reader comprehension.
