# Supplementary material for: Media Consumption and Creation in Attitudes Toward and Knowledge of Inflammatory Bowel Disease: Web-Based Survey
Source: PubMed Central journal article supplement (PMC5741823; doi:10.2196/jmir.7624), 2017-12-08
Supplement: jmir_v19i12e403_app2.pdf [file jmir_v19i12e403_app2.pdf]

## Appendix B

### Checklist for Reporting Results of Internet E-Surveys (CHERRIES)

| <b>Item Category</b>                                                                        | <b>Checklist Item</b>            | <b>Explanation</b>                                                                                                                                                                                                                                                                                                                                                                                                                                                                                                                                     |
|---------------------------------------------------------------------------------------------|----------------------------------|--------------------------------------------------------------------------------------------------------------------------------------------------------------------------------------------------------------------------------------------------------------------------------------------------------------------------------------------------------------------------------------------------------------------------------------------------------------------------------------------------------------------------------------------------------|
| <b>Design</b>                                                                               | Describe survey design           | <p>Target population: a nationally representative sample of the American public as per US Census figures.</p> <p>Survey topics included feelings of isolation, attitudes toward fatalism, overall life satisfaction, social media use and participation, awareness of IBD including stigmas associations with IBD and IBD symptoms, and knowledge of 12 low-barrier facts about IBD. The IBD knowledge survey was designed by a team of subject matter experts including IBD clinicians and researchers from the Boston University Medical Center.</p> |
| <b>IRB approval &amp; informed consent process</b>                                          | IRB approval                     |                                                                                                                                                                                                                                                                                                                                                                                                                                                                                                                                                        |
|                                                                                             | Informed consent                 |                                                                                                                                                                                                                                                                                                                                                                                                                                                                                                                                                        |
|                                                                                             | Data protection                  | No personal identifying information was collected.                                                                                                                                                                                                                                                                                                                                                                                                                                                                                                     |
| <b>Development and pre-testing</b>                                                          | Development and testing          | <p>This study was prompted, in part, by earlier findings by the lead author regarding the dynamic role of social media in public awareness of antimicrobial resistance. Indexes investigating personal characteristics and media consumption were built upon a series of already validated instruments. The questionnaire regarding IBD knowledge was developed by a team of subject matter experts including IBD clinicians and researchers from the Boston University Medical Center.</p>                                                            |
| <b>Recruitment process and description of the sample having access to the questionnaire</b> | Open survey versus closed survey |                                                                                                                                                                                                                                                                                                                                                                                                                                                                                                                                                        |
|                                                                                             | Contact mode                     |                                                                                                                                                                                                                                                                                                                                                                                                                                                                                                                                                        |
|                                                                                             | Advertising the survey           |                                                                                                                                                                                                                                                                                                                                                                                                                                                                                                                                                        |

|                                                             |                                                                                |  |
|-------------------------------------------------------------|--------------------------------------------------------------------------------|--|
| <b>Survey administration</b>                                | Web/Email                                                                      |  |
|                                                             | Context                                                                        |  |
|                                                             | Mandatory/voluntary                                                            |  |
|                                                             | Incentives                                                                     |  |
|                                                             | Time/Date                                                                      |  |
|                                                             | Randomizations of items or questionnaires                                      |  |
|                                                             | Adaptive questioning                                                           |  |
|                                                             | Number of items                                                                |  |
|                                                             | Number of screens                                                              |  |
|                                                             | Completeness check                                                             |  |
|                                                             | Review step                                                                    |  |
| <b>Response rates</b>                                       | Unique site visitor                                                            |  |
|                                                             | View rate (Ratio unique site visitors/unique survey visitors)                  |  |
|                                                             | Participation rate (Ratio unique survey page visitors/agreed to participation) |  |
|                                                             | Completion rate (Ratio agreed to participate/finished survey)                  |  |
| <b>Preventing multiple entries from the same individual</b> | Cookies used                                                                   |  |
|                                                             | IP check                                                                       |  |
|                                                             | Log file analysis                                                              |  |
| <b>Analysis</b>                                             | Handling of incomplete questionnaires                                          |  |
|                                                             | Questionnaires submitted with an atypical time stamp                           |  |
|                                                             | Statistical correction                                                         |  |
|                                                             |                                                                                |  |

|  |  |  |
|--|--|--|
|  |  |  |
|--|--|--|

Eysenbach G. (2004). Improving the quality of web surveys: the checklist for reporting results of interest e-surveys (cherries). *Journal of Medical Internet Research*, 6(3)e34  
doi:10.2196/jmir.6.3.e34. <http://www.jmir.org/2004/3/e34/>
